# Supplementary material for: Nonlinear optical response mechanism of noncentrosymmetric lead borate Pb6[B4O7(OH)2]3with three crystallographically independent [B4O7(OH)2]4−chains
Source: Royal Society of Chemistry journal article supplement (doi:10.1039/c6ra23193d), 2016-01-01
Supplement: c6ra23193d1.pdf [file c6ra23193d1.pdf]

**Nonlinear Optical Response Mechanism of Noncentrosymmetric  
Lead Borate  $\text{Pb}_6[\text{B}_4\text{O}_7(\text{OH})_2]_3$  with Three Crystallographically  
Independent  $[\text{B}_4\text{O}_7(\text{OH})_2]_4^-$  Chains**

(Electronic Supplementary Information: 12 pages)

Xuefei Wang,<sup>a, b</sup> Fangfang Zhang,<sup>a, \*</sup> Bing-Hua Lei,<sup>a, b</sup> Zhihua Yang,<sup>a</sup> Shilie Pan<sup>a, \*</sup>

<sup>a</sup> *Key Laboratory of Functional Materials and Devices for Special Environments, Xinjiang Technical*

*Institute of Physics and Chemistry, Chinese Academy of Sciences; Xinjiang Key Laboratory of Electronic*

*Information Materials and Devices, 40-1 South Beijing Road, Urumqi 830011, China.*

<sup>b</sup> *University of Chinese Academy of Sciences, Beijing 100049, China.*

\* Corresponding authors. Emails: ffzhang@ms.xjb.ac.cn, slpan@ms.xjb.ac.cn.

**Single crystal X-ray crystallography.** A crystal of  $\text{Pb}_6[\text{B}_4\text{O}_7(\text{OH})_2]_3$  with dimensions of 0.21 mm  $\times$  0.17 mm  $\times$  0.10 mm was chosen for single crystal data collection. The structural data were collected by a Bruker SMART APEX II CCD single-crystal diffractometer equipped monochromatic Mo K $\alpha$  radiation ( $\lambda = 0.71073 \text{ \AA}$ ) at 293 K, and obtained data was integrated with a SAINT program.<sup>1</sup> Numerical absorption corrections were finished by the SCALE program for the area detector.<sup>1</sup> Programs from the SHELXTL crystallographic software package were used for all calculations.<sup>2</sup> All the non-hydrogen atoms were solved by direct methods and refined by full-matrix least-squares techniques with anisotropic thermal parameters. Hydrogen atoms were placed by geometrical method. Final least-squares refinement is on  $F_o^2$  with data having  $F_o^2 \geq 2\sigma(F_o^2)$ . The final structure was checked for missing symmetry elements with PLATON.<sup>3</sup>

---

**Table S1. Crystal data and structure refinements for  $\text{Pb}_6[\text{B}_4\text{O}_7(\text{OH})_2]_3^a$**

---

|                                                   |                                                    |
|---------------------------------------------------|----------------------------------------------------|
| Empirical formula                                 | $\text{Pb}_6[\text{B}_4\text{O}_7(\text{OH})_2]_3$ |
| Formula weight ( $\text{g}\cdot\text{mol}^{-1}$ ) | 1810.91                                            |
| Crystal system                                    | Trigonal                                           |
| Space group                                       | $P3_2(\text{No.145})$                              |
| $a / \text{\AA}$                                  | 11.7732(5)                                         |
| $b / \text{\AA}$                                  | 11.7732(5)                                         |
| $c / \text{\AA}$                                  | 13.345(11)                                         |
| $V / \text{\AA}^3$                                | 1601.8(16)                                         |
| $Z$                                               | 3                                                  |
| $F(000)$                                          | 2322                                               |
| Crystal size / $\text{mm}^3$                      | $0.21 \times 0.17 \times 0.10$                     |

|                                                                                                                                        |                |
|----------------------------------------------------------------------------------------------------------------------------------------|----------------|
| $\vartheta_{\max} / ^\circ$                                                                                                            | 27.43          |
| Reflections collected / Unique                                                                                                         | 9741 / 3873    |
| Completeness / %                                                                                                                       | 99.5           |
| GOF on $F^2$                                                                                                                           | 1.150          |
| $R_1, wR_2 (I > 2\sigma(I))^a$                                                                                                         | 0.0495, 0.1098 |
| $R_1, wR_2$ (all data)                                                                                                                 | 0.0544, 0.1119 |
| Flack parameter                                                                                                                        | 0.01(3)        |
| $^a R_1 = \sum   F_o  -  F_c   / \sum  F_o $ and $wR_2 = [\sum w (F_o^2 - F_c^2)^2 / \sum w F_o^4]^{1/2}$ for $F_o^2 > 2\sigma(F_o^2)$ |                |

**Table S2.** The final coordinates ( $\times 10^4$ ) and equivalent isotropic displacement parameters ( $\text{\AA}^2 \times 10^3$ ) of non-hydrogen atoms for  $\text{Pb}_6[\text{B}_4\text{O}_7(\text{OH})_2]_3$ .  $U_{\text{eq}}$  is defined as one-third of the trace of the orthogonalized Uij tensor, and the Bond Valence Sum (BVS) for each atom in asymmetric unit.

| Atoms | $x/a$    | $y/b$    | $z/c$    | $U_{\text{eq}}$ | BVS |
|-------|----------|----------|----------|-----------------|-----|
| Pb(1) | 2591(1)  | 3986(1)  | 2027(1)  | 11(1)           | 2.1 |
| Pb(2) | 5867(1)  | 7218(1)  | 3294(1)  | 12(1)           | 2.1 |
| Pb(3) | -743(1)  | 1771(1)  | 235(1)   | 12(1)           | 2.2 |
| Pb(4) | 6014(1)  | 5424(1)  | 565(1)   | 10(1)           | 2.1 |
| Pb(5) | 2739(1)  | 2182(1)  | -1039(1) | 15(1)           | 2.0 |
| Pb(6) | 9165(1)  | 5237(1)  | -775(1)  | 11(1)           | 2.1 |
| B(1)  | 660(40)  | -30(40)  | 190(30)  | 15(4)           | 3.0 |
| B(2)  | 6020(30) | 3400(30) | -890(20) | 3(6)            | 3.1 |
| B(3)  | 2240(30) | 4450(30) | -370(30) | 7(6)            | 3.0 |

---

|       |           |           |           |       |     |
|-------|-----------|-----------|-----------|-------|-----|
| B(4)  | 420(30)   | 690(30)   | 1930(20)  | 5(6)  | 3.0 |
| B(5)  | 2790(30)  | 6050(30)  | 3500(30)  | 10(7) | 3.1 |
| B(6)  | 3760(30)  | 7390(30)  | 1920(30)  | 11(7) | 3.0 |
| B(7)  | -1200(30) | 1530(30)  | -2040(30) | 12(7) | 3.0 |
| B(8)  | 5580(40)  | 4390(40)  | 2910(30)  | 15(4) | 3.0 |
| B(9)  | 6940(30)  | 4060(30)  | -2600(20) | 5(6)  | 3.0 |
| B(10) | 6130(30)  | 8260(40)  | 1140(30)  | 15(4) | 3.0 |
| B(11) | -1160(40) | -2180(30) | -260(30)  | 14(7) | 3.1 |
| B(12) | 5440(30)  | 4900(30)  | -1900(20) | 4(6)  | 2.8 |
| O(1)  | 5243(17)  | 4048(17)  | -1029(14) | 4(4)  | 2.1 |
| O(2)  | 7099(17)  | 3840(17)  | -1548(14) | 4(4)  | 2.1 |
| O(3)  | 36(18)    | 430(18)   | 859(15)   | 7(4)  | 2.0 |
| O(4)  | 10389(19) | 5903(19)  | 1045(15)  | 10(4) | 1.1 |
| O(5)  | 1630(20)  | 3140(20)  | -245(17)  | 15(5) | 2.0 |
| O(6)  | -1317(18) | 568(18)   | -1313(15) | 7(4)  | 2.1 |
| O(7)  | 4920(20)  | 5050(20)  | 2728(16)  | 12(4) | 1.9 |
| O(8)  | 6910(20)  | 9581(19)  | 693(16)   | 12(4) | 1.2 |
| O(9)  | 6752(17)  | 4819(17)  | 2388(14)  | 4(4)  | 1.9 |
| O(10) | 2(19)     | -1513(19) | 234(15)   | 8(4)  | 1.9 |
| O(11) | -40(20)   | 1520(20)  | 2341(17)  | 15(5) | 2.0 |
| O(12) | 1736(19)  | 5006(19)  | -1017(15) | 9(4)  | 1.8 |
| O(13) | 8277(19)  | 4871(18)  | -3077(15) | 8(4)  | 1.9 |

---

|       |           |          |           |       |     |
|-------|-----------|----------|-----------|-------|-----|
| O(14) | 5390(18)  | 7349(17) | 325(14)   | 4(4)  | 2.0 |
| O(15) | 3273(18)  | 6194(18) | 2479(14)  | 5(4)  | 2.2 |
| O(16) | 589(19)   | 360(19)  | -842(15)  | 10(4) | 2.0 |
| O(17) | 6184(19)  | 4711(19) | -2741(15) | 8(4)  | 2.1 |
| O(18) | -2570(20) | 1160(20) | -2323(17) | 19(5) | 1.1 |
| O(19) | 7058(18)  | 7871(18) | 1548(14)  | 7(4)  | 1.2 |
| O(20) | 6500(17)  | 3711(17) | 173(14)   | 4(4)  | 2.0 |
| O(21) | 3370(20)  | 5240(20) | 201(15)   | 11(4) | 1.9 |
| O(22) | 3815(18)  | 6667(18) | 4187(14)  | 7(4)  | 2.0 |
| O(23) | 8130(19)  | 6500(19) | -188(15)  | 10(4) | 1.8 |
| O(24) | -520(20)  | 1550(20) | -2911(17) | 14(5) | 2.1 |
| O(25) | 278(19)   | 3969(19) | 1712(15)  | 9(4)  | 1.1 |
| O(26) | 5250(20)  | 8190(20) | 1961(17)  | 16(5) | 2.0 |
| O(27) | -690(20)  | 2850(20) | -1565(16) | 15(5) | 1.1 |

**Table S3.** Selected bond distances (Å) and bond angles (deg.) for  $\text{Pb}_6[\text{B}_4\text{O}_7(\text{OH})_2]_3$ .

|                          |           |                              |          |
|--------------------------|-----------|------------------------------|----------|
| Pb(1)-O(15)              | 2.383(18) | O(6)-Pb(3)-O(5)              | 93.1(7)  |
| Pb(1)-O(14) <sup>a</sup> | 2.526(19) | O(3)-Pb(3)-O(27)             | 135.2(7) |
| Pb(1)-O(7)               | 2.56(2)   | O(6)-Pb(3)-O(27)             | 56.4(6)  |
| Pb(1)-O(25)              | 2.745(19) | O(5)-Pb(3)-O(27)             | 73.5(7)  |
| Pb(1)-O(21)              | 2.76(2)   | O(3)-Pb(3)-O(8) <sup>b</sup> | 80.5(6)  |
| Pb(2)-O(7)               | 2.34(2)   | O(6)-Pb(3)-O(8) <sup>b</sup> | 77.4(6)  |

---

|                          |           |                                 |          |
|--------------------------|-----------|---------------------------------|----------|
| Pb(2)-O(26)              | 2.41(2)   | O(5)-Pb(3)-O(8) <sup>b</sup>    | 159.0(6) |
| Pb(2)-O(22)              | 2.472(18) | O(27)-Pb(3)-O(8) <sup>b</sup>   | 114.5(6) |
| Pb(2)-O(19)              | 2.628(19) | O(23)-Pb(4)-O(20)               | 74.4(6)  |
| Pb(3)-O(3)               | 2.339(18) | O(23)-Pb(4)-O(1)                | 86.1(6)  |
| Pb(3)-O(6)               | 2.40(2)   | O(20)-Pb(4)-O(1)                | 56.4(6)  |
| Pb(3)-O(5)               | 2.52(2)   | O(23)-Pb(4)-O(14)               | 98.8(6)  |
| Pb(3)-O(27)              | 2.71(2)   | O(20)-Pb(4)-O(14)               | 160.7(6) |
| Pb(3)-O(8) <sup>b</sup>  | 2.74(2)   | O(1)-Pb(4)-O(14)                | 105.8(6) |
| Pb(4)-O(23)              | 2.38(2)   | O(5)-Pb(5)-O(16)                | 77.8(7)  |
| Pb(4)-O(20)              | 2.413(18) | O(5)-Pb(5)-O(24) <sup>c</sup>   | 89.6(7)  |
| Pb(4)-O(1)               | 2.550(18) | O(16)-Pb(5)-O(24) <sup>c</sup>  | 56.7(7)  |
| Pb(4)-O(14)              | 2.728(18) | O(5)-Pb(5)-O(1)                 | 104.5(7) |
| Pb(5)-O(5)               | 2.36(2)   | O(16)-Pb(5)-O(1)                | 171.0(6) |
| Pb(5)-O(16)              | 2.377(19) | O(24) <sup>c</sup> -Pb(5)-O(1)  | 114.5(6) |
| Pb(5)-O(24) <sup>c</sup> | 2.59(2)   | O(17) <sup>d</sup> -Pb(6)-O(2)  | 89.5(7)  |
| Pb(5)-O(1)               | 2.654(18) | O(17) <sup>d</sup> -Pb(6)-O(23) | 96.0(7)  |
| Pb(6)-O(17) <sup>d</sup> | 2.33(2)   | O(2)-Pb(6)-O(23)                | 85.0(6)  |
| Pb(6)-O(2)               | 2.384(18) | O(17) <sup>d</sup> -Pb(6)-O(4)  | 56.2(6)  |
| Pb(6)-O(23)              | 2.474(19) | O(2)-Pb(6)-O(4)                 | 142.4(6) |
| Pb(6)-O(4)               | 2.73(2)   | O(23)-Pb(6)-O(4)                | 83.9(6)  |
| B(1)-O(3)                | 1.43(4)   | O(3)-B(1)-O(16)                 | 110(3)   |
| B(1)-O(16)               | 1.47(4)   | O(3)-B(1)-O(24) <sup>c</sup>    | 112(3)   |

---

---

|                         |         |                                            |        |
|-------------------------|---------|--------------------------------------------|--------|
| B(1)-O(24) <sup>c</sup> | 1.48(4) | O(16)-B(1)-O(24) <sup>c</sup>              | 107(3) |
| B(1)-O(10)              | 1.51(4) | O(3)-B(1)-O(10)                            | 110(3) |
| B(2)-O(2)               | 1.41(3) | O(16)-B(1)-O(10)                           | 109(3) |
| B(2)-O(1)               | 1.47(3) | O(24) <sup>c</sup> -B(1)-O(10)             | 108(2) |
| B(2)-O(20)              | 1.50(3) | O(2)-B(2)-O(1)                             | 114(2) |
| B(2)-O(9) <sup>e</sup>  | 1.50(3) | O(2)-B(2)-O(20)                            | 110(2) |
| B(3)-O(5)               | 1.34(4) | O(1)-B(2)-O(20)                            | 104(2) |
| B(3)-O(12)              | 1.39(4) | O(2)-B(2)-O(9) <sup>e</sup>                | 110(2) |
| B(3)-O(21)              | 1.40(4) | O(1)-B(2)-O(9) <sup>e</sup>                | 112(2) |
| B(4)-O(11)              | 1.44(4) | O(20)-B(2)-O(9) <sup>e</sup>               | 106(2) |
| B(4)-O(3)               | 1.48(4) | O(5)-B(3)-O(12)                            | 120(3) |
| B(4)-O(16) <sup>c</sup> | 1.51(4) | O(5)-B(3)-O(21)                            | 119(3) |
| B(4)-O(6) <sup>c</sup>  | 1.51(3) | O(12)-B(3)-O(21)                           | 121(3) |
| B(5)-O(22)              | 1.40(4) | O(11)-B(4)-O(3)                            | 109(2) |
| B(5)-O(15)              | 1.46(4) | O(11)-B(4)-O(16) <sup>c</sup>              | 108(2) |
| B(5)-O(14) <sup>a</sup> | 1.49(4) | O(3)-B(4)-O(16) <sup>c</sup>               | 109(2) |
| B(5)-O(21) <sup>a</sup> | 1.54(4) | O(11)-B(4)-O(6) <sup>c</sup>               | 111(2) |
| B(6)-O(15)              | 1.44(4) | O(3)-B(4)-O(6) <sup>c</sup>                | 110(2) |
| B(6)-O(22) <sup>f</sup> | 1.49(4) | O(16) <sup>c</sup> -B(4)-O(6) <sup>c</sup> | 109(2) |
| B(6)-O(12) <sup>a</sup> | 1.50(4) | O(22)-B(5)-O(15)                           | 111(2) |
| B(6)-O(26)              | 1.52(4) | O(22)-B(5)-O(14) <sup>a</sup>              | 114(2) |
| B(7)-O(24)              | 1.41(4) | O(15)-B(5)-O(14) <sup>a</sup>              | 105(2) |

---

---

|                                |         |                                             |        |
|--------------------------------|---------|---------------------------------------------|--------|
| B(7)-O(6)                      | 1.45(4) | O(22)-B(5)-O(21) <sup>a</sup>               | 112(2) |
| B(7)-O(18)                     | 1.49(4) | O(15)-B(5)-O(21) <sup>a</sup>               | 107(2) |
| B(7)-O(27)                     | 1.49(4) | O(14) <sup>a</sup> -B(5)-O(21) <sup>a</sup> | 107(2) |
| B(8)-O(13) <sup>g</sup>        | 1.35(4) | O(15)-B(6)-O(22) <sup>f</sup>               | 112(2) |
| B(8)-O(7)                      | 1.37(4) | O(15)-B(6)-O(12) <sup>a</sup>               | 113(3) |
| B(8)-O(9)                      | 1.39(4) | O(22) <sup>f</sup> -B(6)-O(12) <sup>a</sup> | 105(2) |
| B(9)-O(17)                     | 1.45(3) | O(15)-B(6)-O(26)                            | 111(2) |
| B(9)-O(2)                      | 1.45(4) | O(22) <sup>f</sup> -B(6)-O(26)              | 109(2) |
| B(9)-O(20) <sup>e</sup>        | 1.49(3) | O(12) <sup>a</sup> -B(6)-O(26)              | 107(2) |
| B(9)-O(13)                     | 1.51(3) | O(24)-B(7)-O(6)                             | 113(3) |
| B(10)-O(14)                    | 1.47(4) | O(24)-B(7)-O(18)                            | 109(3) |
| B(10)-O(26)                    | 1.48(4) | O(6)-B(7)-O(18)                             | 106(3) |
| B(10)-O(8)                     | 1.48(4) | O(24)-B(7)-O(27)                            | 114(3) |
| B(10)-O(19)                    | 1.49(4) | O(6)-B(7)-O(27)                             | 111(3) |
| B(11)-O(23) <sup>b</sup>       | 1.35(4) | O(18)-B(7)-O(27)                            | 103(2) |
| B(11)-O(10)                    | 1.36(4) | O(13) <sup>g</sup> -B(8)-O(7)               | 121(3) |
| B(11)-O(11) <sup>h</sup>       | 1.40(4) | O(13) <sup>g</sup> -B(8)-O(9)               | 123(3) |
| B(12)-O(1)                     | 1.48(3) | O(7)-B(8)-O(9)                              | 116(3) |
| B(12)-O(25) <sup>f</sup>       | 1.49(3) | O(17)-B(9)-O(2)                             | 113(2) |
| B(12)-O(4) <sup>e</sup>        | 1.49(3) | O(17)-B(9)-O(20) <sup>e</sup>               | 109(2) |
| B(12)-O(17)                    | 1.50(4) | O(2)-B(9)-O(20) <sup>e</sup>                | 111(2) |
| O(15)-Pb(1)-O(14) <sup>a</sup> | 56.8(6) | O(17)-B(9)-O(13)                            | 109(2) |

---



---

|                                 |          |                                              |        |
|---------------------------------|----------|----------------------------------------------|--------|
| O(15)-Pb(1)-O(7)                | 71.2(6)  | O(2)-B(9)-O(13)                              | 110(2) |
| O(14) <sup>a</sup> -Pb(1)-O(7)  | 86.6(6)  | O(20) <sup>e</sup> -B(9)-O(13)               | 106(2) |
| O(15)-Pb(1)-O(25)               | 80.7(6)  | O(14)-B(10)-O(26)                            | 112(3) |
| O(14) <sup>a</sup> -Pb(1)-O(25) | 72.5(6)  | O(14)-B(10)-O(8)                             | 108(3) |
| O(7)-Pb(1)-O(25)                | 151.2(6) | O(26)-B(10)-O(8)                             | 115(3) |
| O(15)-Pb(1)-O(21)               | 78.5(6)  | O(14)-B(10)-O(19)                            | 107(3) |
| O(14) <sup>a</sup> -Pb(1)-O(21) | 132.4(6) | O(26)-B(10)-O(19)                            | 108(3) |
| O(7)-Pb(1)-O(21)                | 94.2(6)  | O(8)-B(10)-O(19)                             | 107(2) |
| O(25)-Pb(1)-O(21)               | 86.1(6)  | O(23) <sup>b</sup> -B(11)-O(10)              | 120(3) |
| O(7)-Pb(2)-O(26)                | 100.7(7) | O(23) <sup>b</sup> -B(11)-O(11) <sup>h</sup> | 118(3) |
| O(7)-Pb(2)-O(22)                | 89.9(7)  | O(10)-B(11)-O(11) <sup>h</sup>               | 121(3) |
| O(26)-Pb(2)-O(22)               | 89.7(7)  | O(1)-B(12)-O(25) <sup>f</sup>                | 112(2) |
| O(7)-Pb(2)-O(19)                | 85.8(7)  | O(1)-B(12)-O(4) <sup>e</sup>                 | 106(2) |
| O(26)-Pb(2)-O(19)               | 56.7(7)  | O(25) <sup>f</sup> -B(12)-O(4) <sup>e</sup>  | 106(2) |
| O(22)-Pb(2)-O(19)               | 144.3(6) | O(1)-B(12)-O(17)                             | 113(2) |
| O(3)-Pb(3)-O(6)                 | 89.9(7)  | O(25) <sup>f</sup> -B(12)-O(17)              | 112(2) |
| O(3)-Pb(3)-O(5)                 | 80.8(7)  | O(4) <sup>e</sup> -B(12)-O(17)               | 107(2) |

---

Symmetry transformations used to generate equivalent atoms:

- |                           |                        |                          |
|---------------------------|------------------------|--------------------------|
| (a) $-x+y, -x+1, z+1/3$   | (b) $x-1, y-1, z$      | (c) $-x+y, -x, z+1/3$    |
| (d) $-x+y+1, -x+1, z+1/3$ | (e) $-y+1, x-y, z-1/3$ | (f) $-y+1, x-y+1, z-1/3$ |
| (g) $-y+1, x-y, z+2/3$    | (h) $-y, x-y, z-1/3$   | (i) $x+1, y+1, z$        |
| (j) $-x+y+1, -x+1, z-2/3$ |                        |                          |

**Microphotography.**

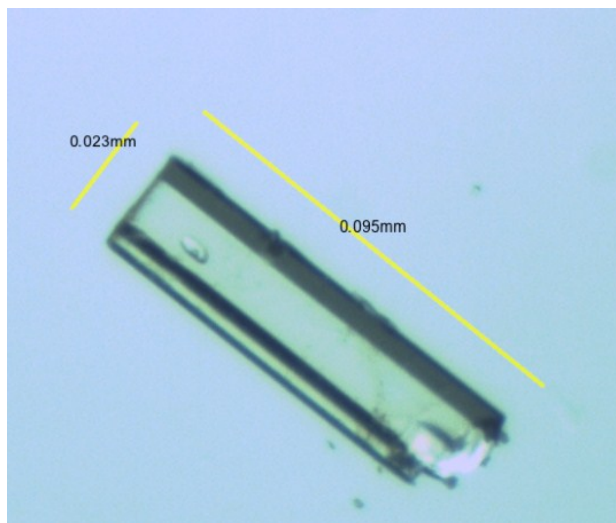

**Fig. S1** Microphotography of  $\text{Pb}_6[\text{B}_4\text{O}_7(\text{OH})_2]_3$ .

**Powder XRD.** Powder X-ray diffraction (PXRD) was carried out by a Bruker D2 PHASER X-ray diffractometer equipped a diffracted beam monochromator for obtaining Cu  $K\alpha$  radiation whose wavelength is 1.5418 Å. The scan step is 0.02 ° per second with the angular range of 10-70 ° (see Fig. S2).

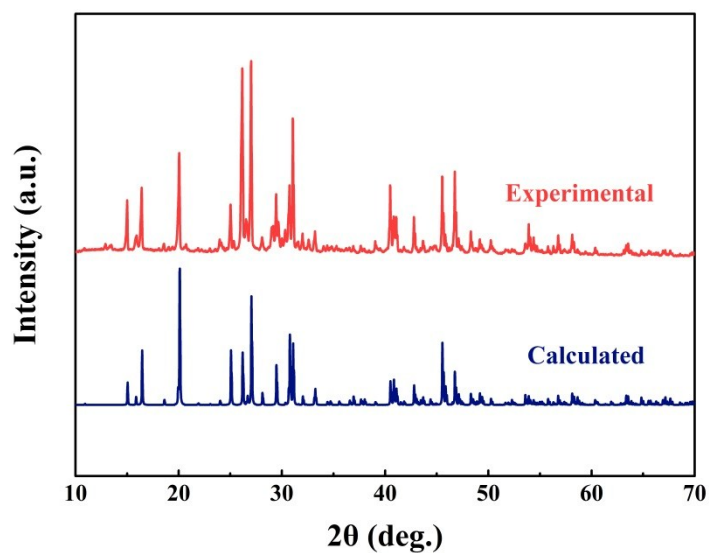

**Fig. S2** Experimental and calculated XRD patterns of  $\text{Pb}_6[\text{B}_4\text{O}_7(\text{OH})_2]_3$ .

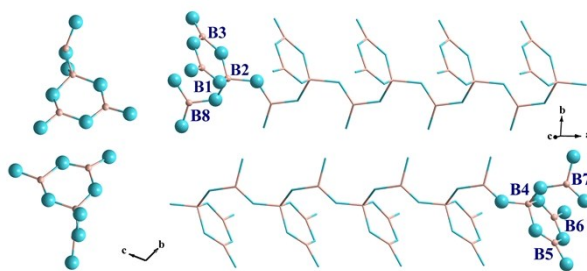

**Fig. S3** Two crystallographically independent  $[B_4O_8]^{4-}$  chains in  $Bi[B_4O_6(OH)_2]OH$ .

**IR spectroscopy.** The IR spectrum was determined by a Shimadzu IR Affinity-1 Fourier transform infrared spectrometer for the range of 400 to  $4000\text{ cm}^{-1}$ . Incidentally, the sample for the IR spectrum measurement is composed by dried high-purity KBr (400 mg) and the polycrystalline powder of  $Pb_6[B_4O_7(OH)_2]_3$  (4 mg).

The structural units of  $Pb_6[B_4O_7(OH)_2]_3$  were confirmed by IR spectrum (see Fig. S4). The absorption peaks at  $1305\text{ cm}^{-1}$  and  $955\text{ cm}^{-1}$  were recognized, which could be assigned to the asymmetric stretching vibrations and symmetric stretching vibrations of  $[BO_3]^{3-}$ . Analogously, the asymmetric and symmetric stretching vibrations of  $[BO_4]^{5-}$  groups correspond to the peaks at  $1036$  and  $734\text{ cm}^{-1}$ , respectively. The bending vibrations of  $[BO_3]^{3-}$  and  $[BO_4]^{5-}$  can also be found in the range of  $400\text{--}800\text{ cm}^{-1}$ . These peaks in the curve are similar to other reported borates, which confirm the existence of  $[BO_3]^{3-}$  and  $[BO_4]^{5-}$  groups.<sup>4</sup> Furthermore, the presence of  $OH^-$  was shown by the broad absorption peak in the range of near  $3450\text{ cm}^{-1}$ .

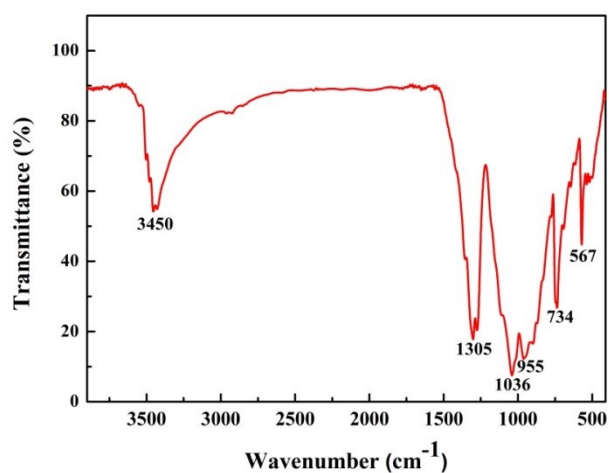

**Fig. S4** The IR spectrum of  $\text{Pb}_6[\text{B}_4\text{O}_7(\text{OH})_2]_3$ .

## Notes and references

- S1 SAINT, Version 7.60A; Bruker Analytical X-ray Instruments, Inc.: Madison, WI, 2008.
- S2 G. M. Sheldrick, SHELXTL, Version 6.14; Bruker Analytical X-ray Instruments, Inc.: Madison, WI, 2008.
- S3 A. Spek, *J. Appl. Crystallogr.*, 2003, **36**, 7-13.
- S4 (a) Q. Jing, X. Dong, Z. Yang and S. Pan, *Dalton Trans.*, 2015, **44**, 16818-16823; (b) D. An, Q. Kong, M. Zhang, Y. Yang, D. Li, Z. Yang, S. Pan, H. Chen, Z. Su, Y. Sun and M. Mutailipu, *Inorg. Chem.*, 2016, **55**, 552-554; (c) M. Wen, X. Su, H. Wu, J. Lu, Z. Yang and S. Pan, *J. Phys. Chem. C*, 2016, **120**, 6190-6197; (d) Y. Yang, X. Su, S. Pan and Z. Yang, *Phys. Chem. Chem. Phys.*, 2015, **17**, 26359-26368.
